# Supplementary material
Source: Research Square preprint supplement (doi:10.21203/rs.3.rs-10198347/v1)
Supplement: Supplementary file 1 [file 7cf944e3baa817aea9c83b1a.docx]

**Supporting Information**

**For**

**An aptamer-controlled Mn-Au oxidase-mimicking nanozyme for smartphone-assisted colorimetric detection of mercury ions**

Chen Ma1*, Yida Zhang2, Shuai Mu3, Yuan Zhang1, Shuoyun Wei1, Quanfang Li1, Shufang Ren1.

1Gansu Province Key Laboratory of Evidence Science Techniques Research and Application, Gansu University of Political Science and Law, Lanzhou, China

2College of Chemistry and Chemical Engineering, Lanzhou University, Lanzhou, PR China

3The First Hospital of Lanzhou University, Lanzhou, PR China

*Corresponding Author. E-mail address: machenfighting@126.com.


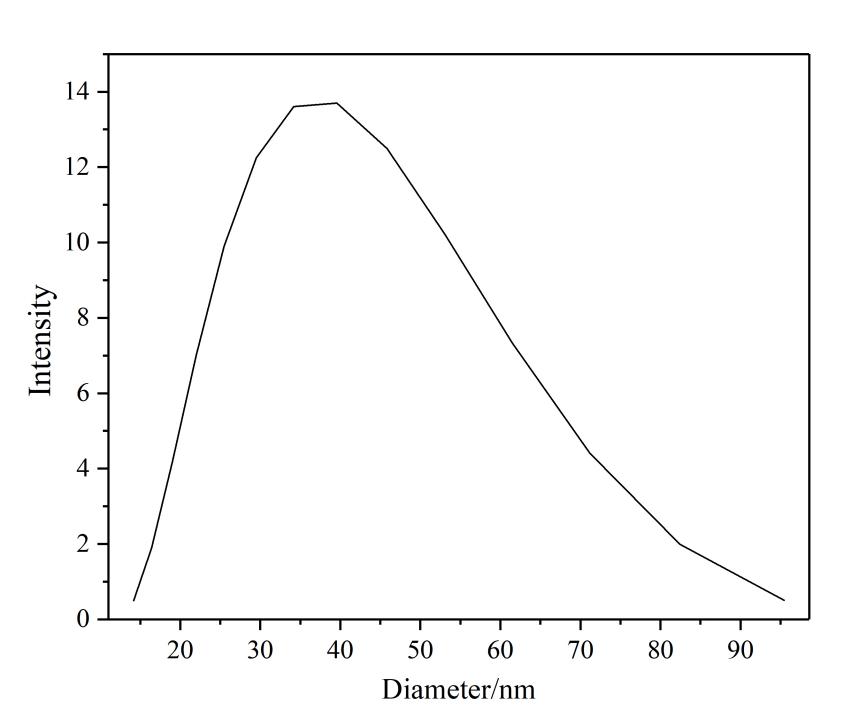


**Figure S1.** Particle size distribution of MnAuNPs.


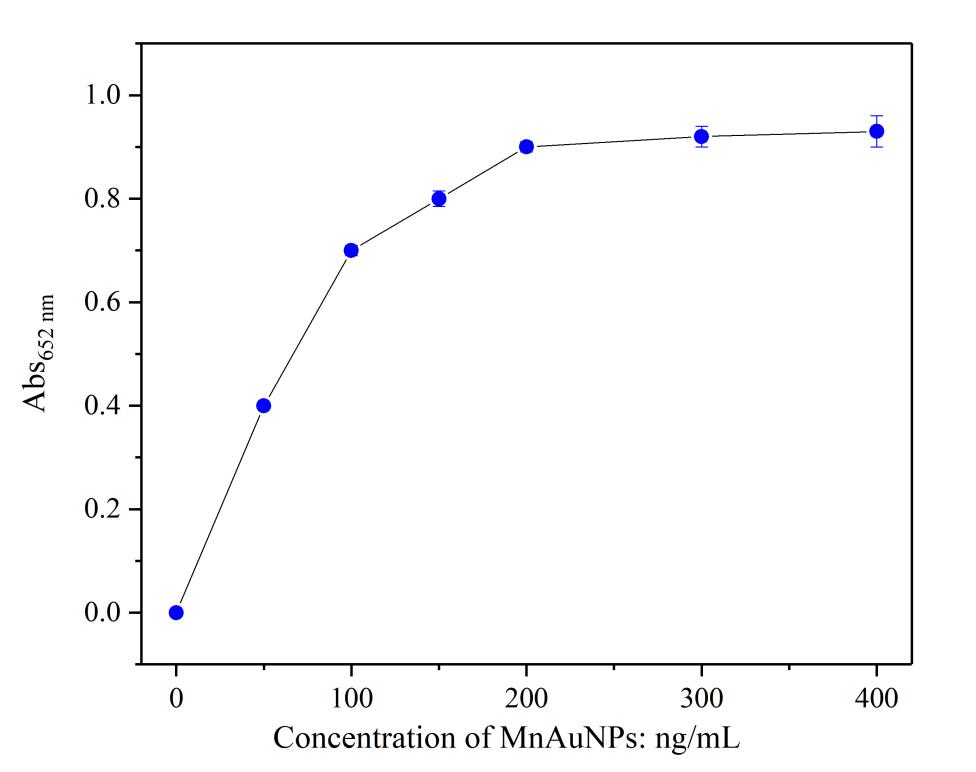


**Figure S2.** Dependence of oxidase-like activity on MnAuNP concentration.


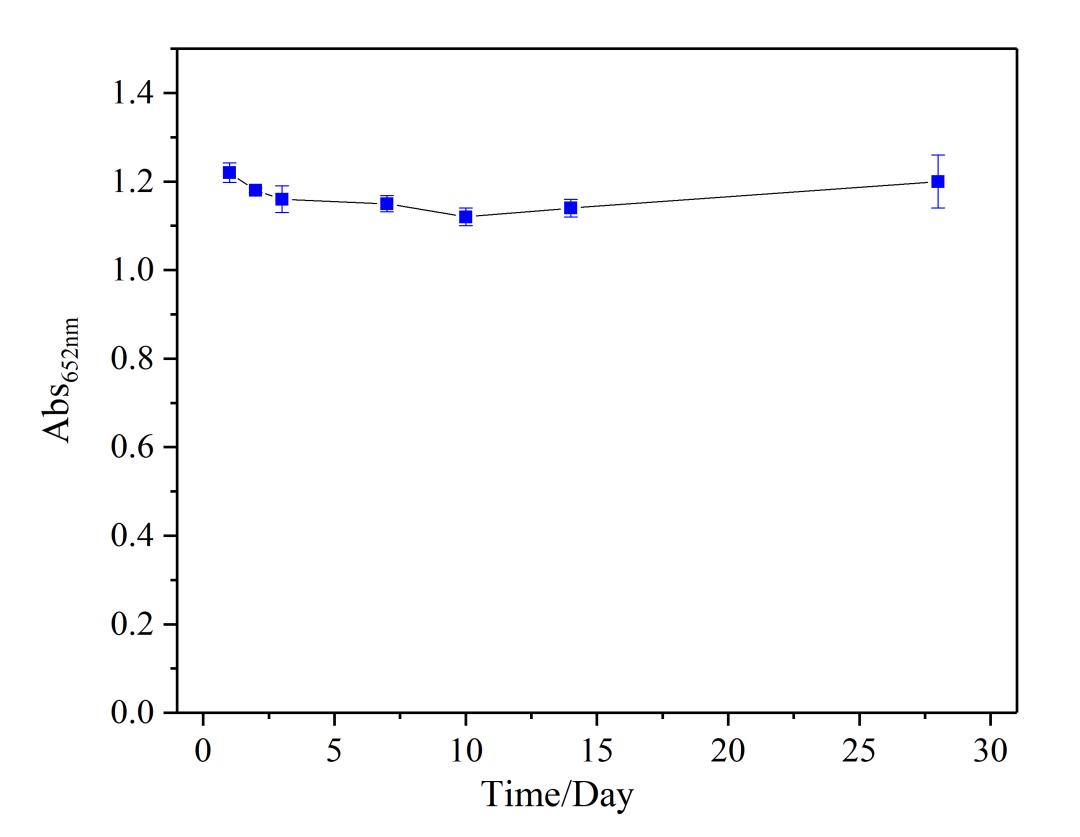


**Figure S3.** Study on long-term storage stability of MnAuNPs.


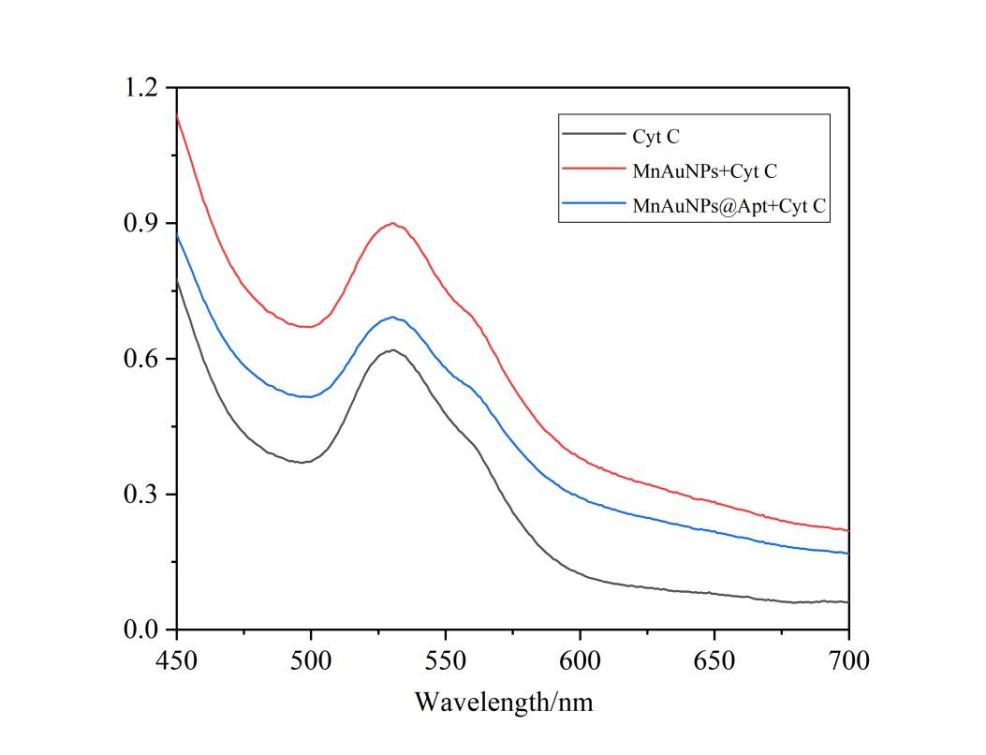


**Figure S4.** UV-vis absorption spectra of cytochrome c after incubation with MnAuNPs and MnAuNPs@Apt, showing a reduced absorption peak of oxidized cytochrome c at 530 nm in the presence of MnAuNPs@Apt.


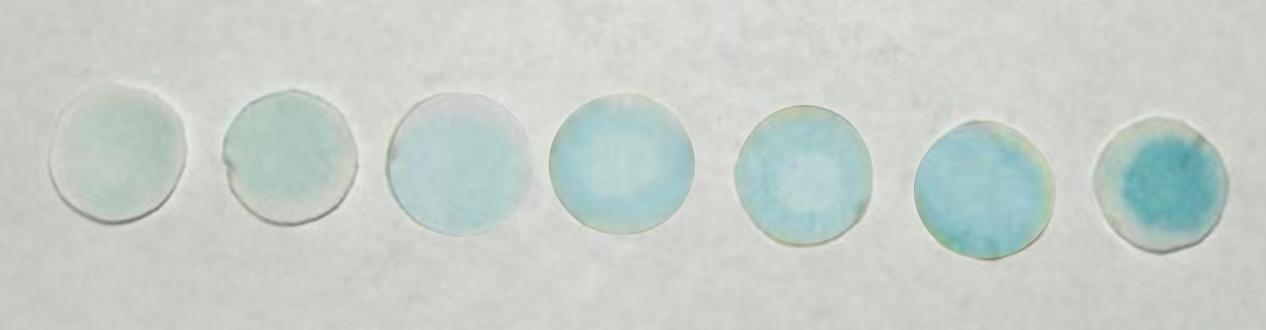


**Figure S5**. Color changes upon exposure to increasing concentrations of Hg2+. From left to right, the concentrations of Hg2+ are 0, 5,10, 20, 30, 40 and 50 μM respectively.

**Table S1.** The *Km* and *Vma*x values of MnAuNPs and other reported oxidase-like catalysts for the substrate of TMB.

| **Materials** | ***Km*(mM)** | ***Vmax*(10−6M S−1)** | **References** |
| --- | --- | --- | --- |
| NSC/Co6Ni3S8 | 0.68 | 0.078 | [1] |
| MnO2 sub-microspheres | 0.10 | 0.2 | [2] |
| OVs-Mn2O3-400 | 0.15 | 0.11 | [3] |
| Mn-PBANaOH@MIP | 0.13 | 0.17 | [4] |
| HS-Mn/Co-MOF | 0.15 | 0.2 | [5] |
| MnAuNPs | 0.21 | 38.8 | This work |

# Reference

1. Liu TT, Li YH, Gu JJ, Zhang L, Qian FY, Li BR, Wang XD (2023) Achieving smartphone-based colorimetric assay for Hg2+ with a bimetallic site strategy based on Hg2+-triggered oxidase-like catalytic activity of NSC/Co6Ni3S8 nanocomposite. Anal Chim Acta 1278:341734. <https://doi.org/10.1016/j.aca.2023.341734>
2. Isho RD, Sher Mohammad NM, Omer KM (2023) Synthesis of MnO2 sub-microspheres with effective oxidase-mimicking nanozymes for the colorimetric assay of ascorbic acid in orange fruits and juice. New J Chem 47:7800. <https://doi.org/10.1039/d3nj00136a>
3. Song Y, Huang C, Li Y (2023) Nanozyme rich in oxygen vacancies derived from Mn-based metal-organic gel for the determination of alkaline phosphatase. Inorg Chem 62:12697-12707. <https://doi.org/10.1021/acs.inorgchem.3c01020>
4. Liu B, Zhu H, Liu J, Wang M, Pan J, Feng R, Hu P, Niu X (2023) Alkali-etched imprinted Mn-based Prussian blue analogues with superior oxidase-mimetic activity and precise recognition for tetracycline colorimetric sensing. ACS Appl Mater Interfaces 15:24251-24260. <https://doi.org/10.1021/acsami.3c02207>
5. Liang T, Huang YL, Yang LWX, Chai YF, Hao ZX, Chen HP, Ma GC (2025) Hollow Mn/Co-MOF as a powerful oxidase-like nanozyme for detection of total antioxidant capacity and black tea fermentation degree. Small 21:2411275. <https://doi.org/10.1002/smll.202411275>
